# Supplementary material
Source: HighWire-hosted journal article supplement (https://bmjopen.bmj.com/content/11/7/e047258)
Supplement: inline-supplementary-material-1 [file inline-supplementary-material-1.pdf]

## Global burden of hip fractures – trends in incidence, post-fracture treatment, and mortality; a study protocol for a multi-country, observational study

Supplementary file

Supplementary Table Ethics approvals in each participating site

| Country/Region         | Ethics statement                                                                                                                                                                                                            | Reference number, if any |
|------------------------|-----------------------------------------------------------------------------------------------------------------------------------------------------------------------------------------------------------------------------|--------------------------|
| <b>Asia-Pacific</b>    |                                                                                                                                                                                                                             |                          |
| Australia              | The study using Victorian linked health data has been approved by the Australian Institute of Health and Welfare and will be reviewed by the Monash University Human Research Ethics Committee                              |                          |
| Hong Kong              | The study is approved by the Institutional Review Board of the University of Hong Kong/Hospital Authority Hong Kong West Cluster (HKU/HA HKW IRB)                                                                           | UW 19-154                |
| Japan                  | The study protocol is approved by the Ethics Committee of the Nihon University School of Pharmacy                                                                                                                           |                          |
| South Korea            | The study protocol is approved by Institutional Review Board of Sungkyunkwan University (SKKU IRB)                                                                                                                          | SKKU 2020-07-017         |
| Singapore              | Ethics approval is not required for the analysis of anonymised administrative data under Singapore's Human Biomedical Research Act                                                                                          |                          |
| New Zealand            | The study was reviewed on the NZ Health and Disability Ethics Committee online site and considered out of scope for review given the retrospective nature of the database study and use of de-identified health information |                          |
| Taiwan                 | The study protocol is approved by The National Cheng Kung University Hospital                                                                                                                                               | B-EX-109-030             |
| Thailand               | The study protocol is approved by the Ethical Review Board of Ubon Ratchathani University                                                                                                                                   | UBU-REG-39/2563          |
| <b>Western Europe</b>  |                                                                                                                                                                                                                             |                          |
| UK                     | The protocol is approved by an Independent Scientific Advisory Committee (ISAC) for access to CPRD data                                                                                                                     |                          |
| Netherlands            | The study protocol is approved by the IPCI Review Board                                                                                                                                                                     | IPCI 5/2020              |
| Italy                  | The study protocol is approved by the Comitato Etico Interaziendale A.O.U. Città della Salute e della Scienza di Torino - A.O. Ordine Mauriziano - A.S.L. Città di Torino                                                   |                          |
| Germany                | Ethics approval is not required                                                                                                                                                                                             |                          |
| France                 | The study protocol is approved by the National Institute of Health Data (INDS) and pending approval by the French data protection commission (Commission Nationale de l'Informatique et des Libertés - CNIL)                | 921079                   |
| Spain                  | The study protocol is under review by the ethics committee                                                                                                                                                                  |                          |
| <b>Northern Europe</b> |                                                                                                                                                                                                                             |                          |
| Denmark                | The study protocol is approved by Danish Data Protection                                                                                                                                                                    |                          |

|                                  | Agency                                                                                                                              |                  |
|----------------------------------|-------------------------------------------------------------------------------------------------------------------------------------|------------------|
| Finland                          | The study protocol is approved by the Health and Social Data Permit Authority Findata                                               | REMS<br>2020/503 |
| <b>South &amp; North America</b> |                                                                                                                                     |                  |
| Brazil                           | The study protocol is under review by The National Commission for Research Ethics (CONEP) and Institutional ethics committees (CEP) |                  |
| Canada                           | Ethics approval is not required                                                                                                     |                  |
| US (Optum)                       | The study protocol is under review by the ethics committee                                                                          |                  |
| US (Medicare)                    | The study protocol has be approved by Office of Human Subjects Research, Hennepin Healthcare Research Institute                     | 20-2342X         |
